# Supplementary material
Source: Elsevier journal article supplement (https://www.sciencedirect.com/science/article/pii/S0210569121000814)
Supplement: mmc3 [file S0210569121000814:mmc3.doc]

**Tabla 1 Material suplementario: Recomendaciones sobre higiene de manos en la atención de pacientes críticos con infección por SARS COV 2**

**1.a. Realización programada de una técnica invasora**.

- Antes de realizar una técnica invasiva programada hacer higiene quirúrgica de manos. Si es posible, antes de colocarse el EPI. Si no es posible, retirar los guantes del equipo EPI (siguiendo las recomendaciones de retirada), realizar la higiene de manos quirúrgica (con agua y jabón antiséptico o con PBA), colocarse nuevos guantes estériles y realizar la técnica.
- Posteriormente proceder a la retirada de los guantes estériles, higiene de manos con PBA y recolocación de nuevos guantes del equipo EPI.

**1.b. Contacto programado con el paciente o con su entorno ambiental**.

- En las manipulaciones programadas no invasivas colocar otros guantes limpios no estériles sobre los guantes de los equipos EPI durante el tiempo que dure la asistencia.
- No utilizar PBA, de forma rutinaria, sobre los guantes de los equipos EPI para su desinfección.

**1.c. Asistencia urgente al paciente o contacto con su entorno por una situación de riesgo vital** en la que es posible la manipulación de dispositivos invasores (catéteres, sondas, drenajes,..). En estos casos, fricción de los guantes del equipo EPI con PBA seguido de la colocación de guantes estériles encima de los guantes del EPI durante el breve tiempo que dure la asistencia. Finalizada la asistencia, retirada de ambos guantes, higiene de manos y colocación de nuevos guantes del equipo EPI.
